# Supplementary material for: Alternate pleckstrin homology domain orientations regulate dynamin-catalyzed membrane fission
Source: PubMed Central journal article supplement — Mol Biol Cell. 2014 Mar 15;25(6):879–90. doi: 10.1091/mbc.E13-09-0548 (PMC3952856; doi:10.1091/mbc.e13-09-0548), 2014-03-15
Supplement: supp_E13-09-0548v1_CombinedSupMats.pdf.pdf [file supp_E13-09-0548v1_CombinedSupMats.pdf.pdf]

# Supplemental Materials

*Molecular Biology of the Cell*

Mehrotra et al.

**SUPPLEMENTAL INFORMATION**

**Alternate pleckstrin homology domain orientations**

**regulate dynamin-catalyzed membrane fission**

Niharika Mehrotra, Justin Nichols and Rajesh Ramachandran\*

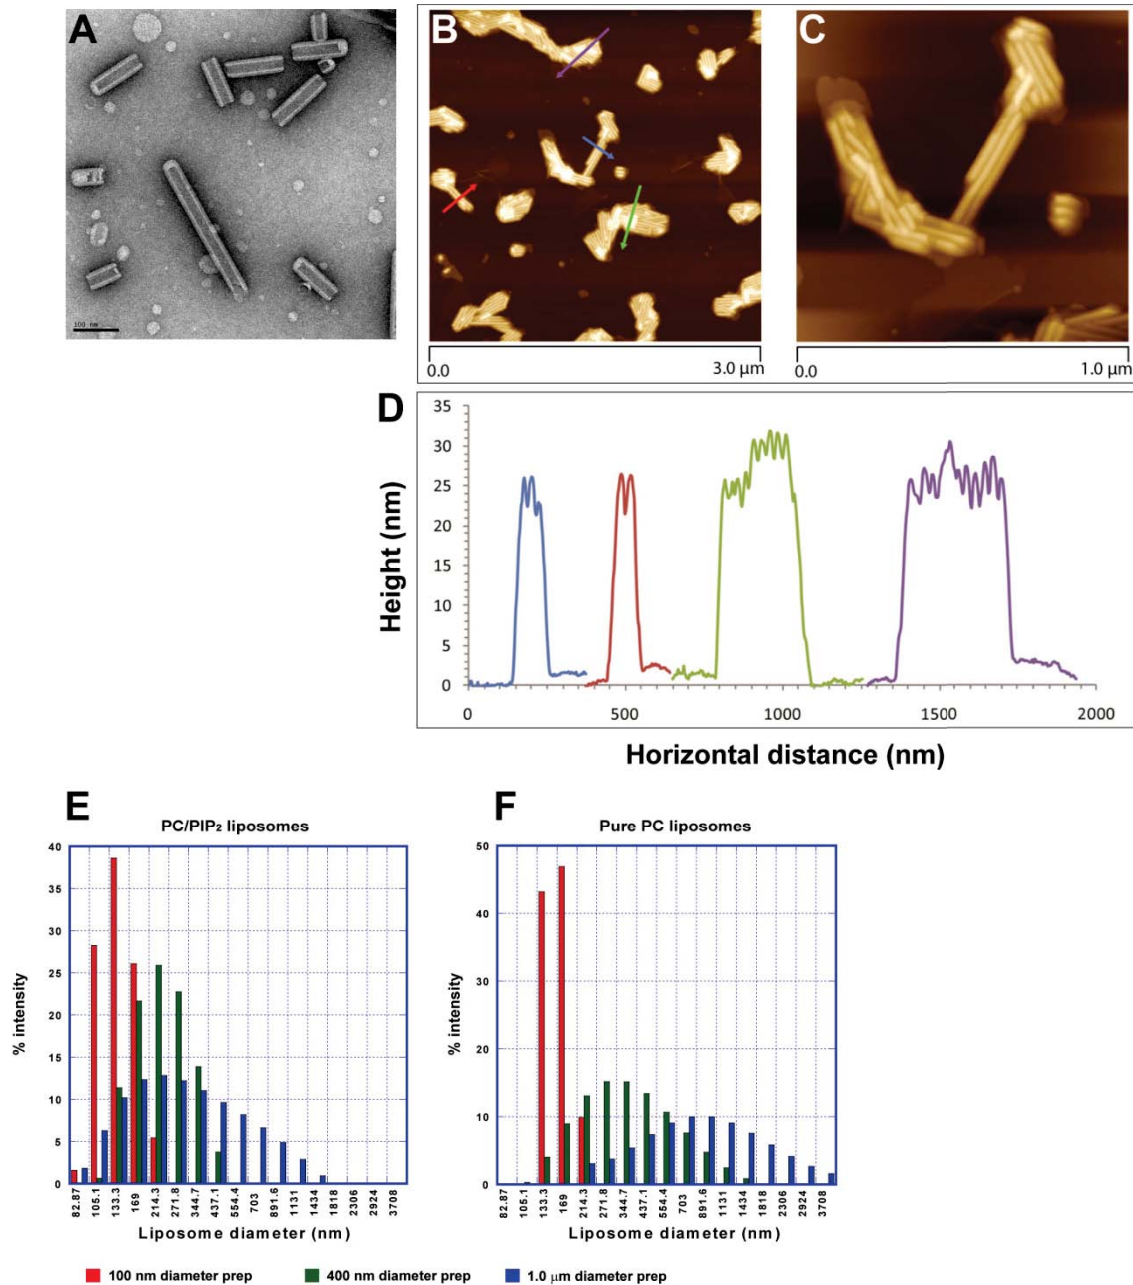

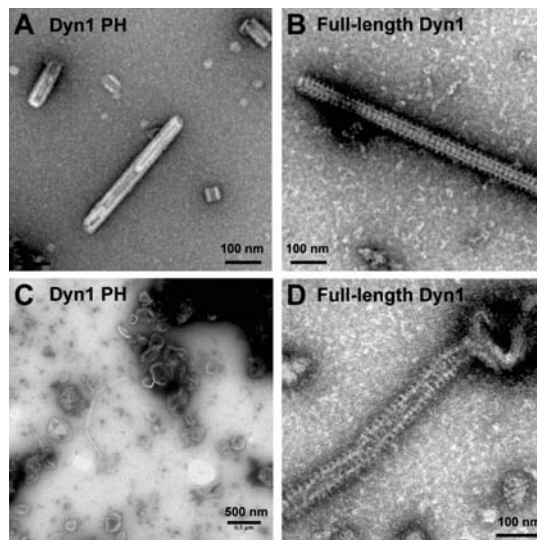

**Figure S2. Negative-stain EM of Dyn1PH WT and full-length Dyn1 WT on LT (A and B) and 400 nm diameter liposomes (C and D), respectively.** Representative images are shown. Samples were deposited on carbon-coated grids and visualized as described under Methods.

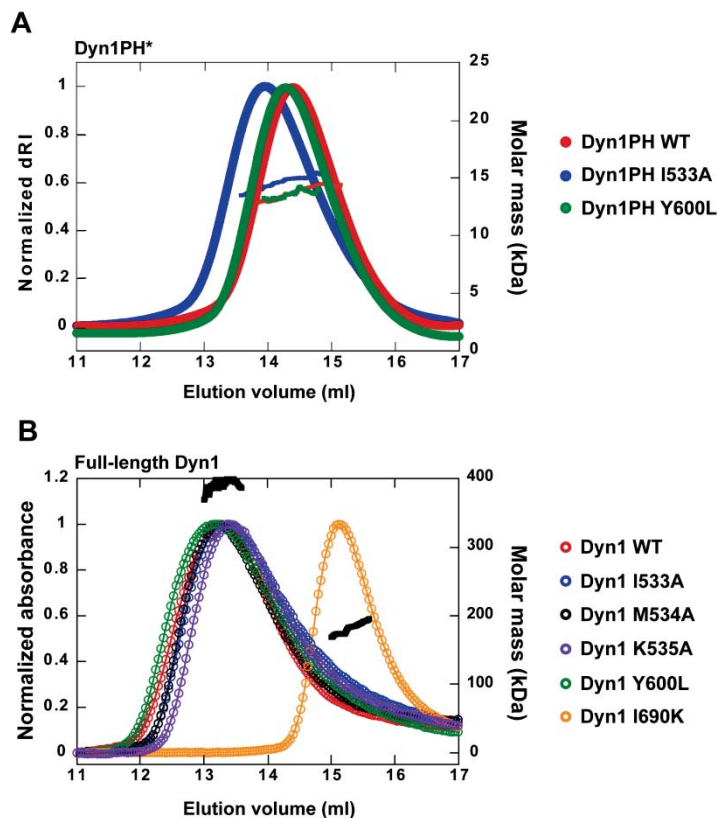

**Figure S3. SEC-MALS analyses of Dyn1PH and full-length Dyn1 mutants.** (A) Isolated Dyn1PH WT and mutants were sieved on a Superdex 75 10/300 GL size-exclusion column and analyzed online by MALS as described under Methods. MALS analyses revealed a monodisperse population of monomers of ~14 kDa for all species (horizontal traces). (B) Full-length dynamin variants were analyzed likewise using a Superose 6 10/300 GL column. All PH domain mutants of full-length dynamin examined in this study formed stable WT-like tetramers of ~400 kDa in contrast to the ~200 kDa dimers formed by the Dyn1 I690K GED mutant.

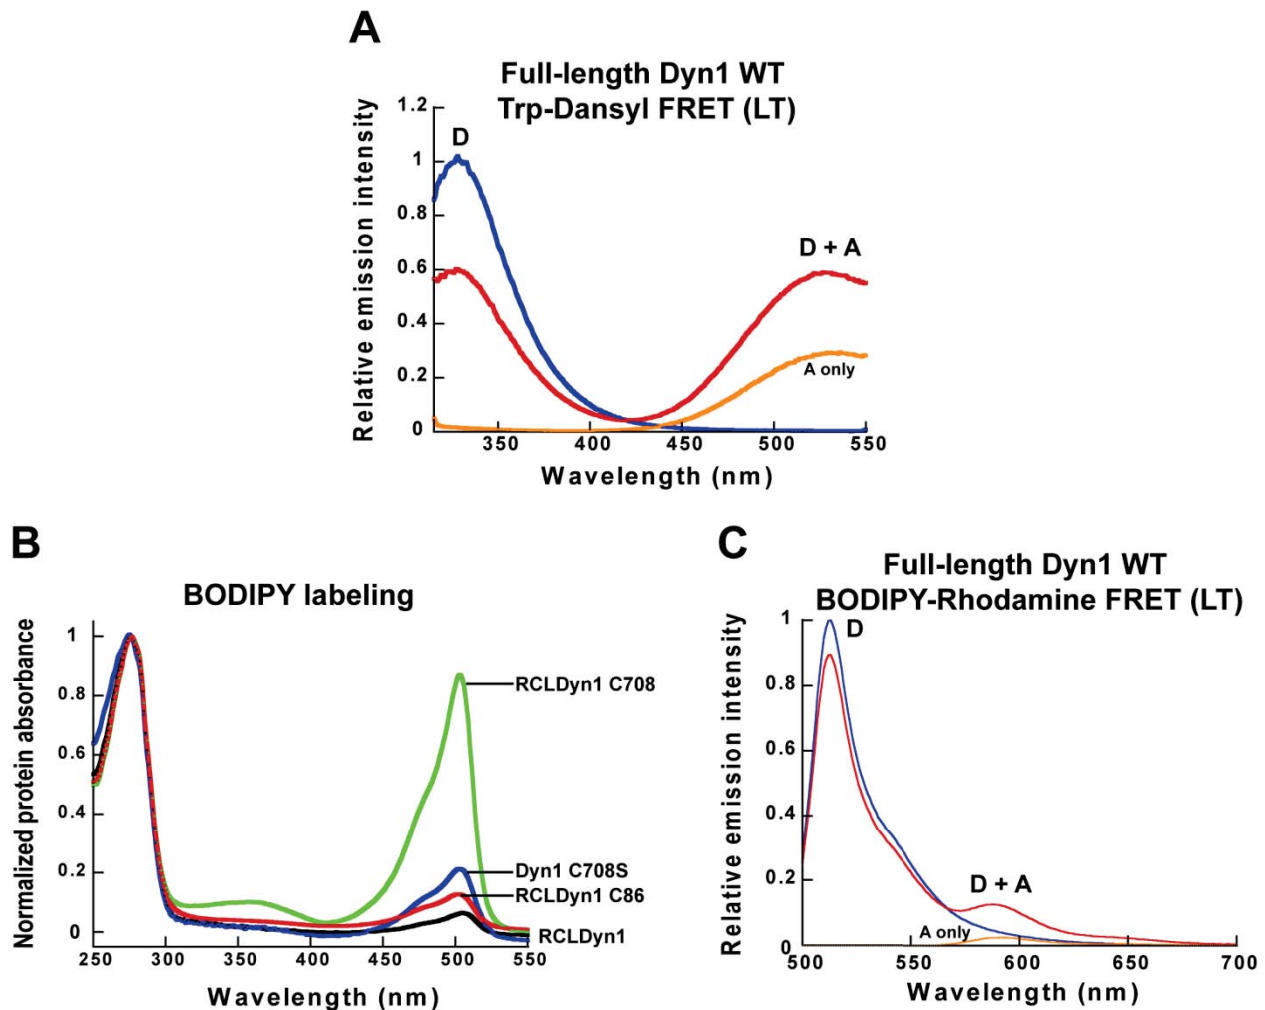

**Figure S4. Demonstration of Trp-Dansyl and BODIPY-Rhodamine FRET.** (A) Representative Trp-Dansyl emission spectra of samples containing: Dyn1 WT (Donor only; BLUE) in the presence of unlabeled LT; Dyn1 WT in the presence of Dansyl-labeled LT (Donor plus Acceptor; RED); and Dansyl-labeled LT (Acceptor only sample; ORANGE) in the absence of protein. FRET was ascertained by the donor emission intensity decrease at 330 nm and sensitized acceptor emission intensity increase at 530 nm upon donor excitation ( $\lambda_{ex} = 280$  nm). The protein and lipid concentrations were 0.1  $\mu$ M and 5  $\mu$ M, respectively. LT contained 10 mol% PIP<sub>2</sub>. (B) Identification of native C708 in GED as the primary target of BODIPY labeling in Dyn1. Normalized absorption spectra of BODIPY-labeled RCLDyn1 C708 (GREEN) and RCLDyn1 C86 (RED) in which all other native Cys residues have been substituted with Ser (Reactive Cys-less Dyn1; Ramachandran and Schmid, 2008) relative to Dyn1 C708S (BLUE) and RCLDyn1 (BLACK; background labeling in the absence of native Cys residues) (Ramachandran et al., 2007, Ramachandran and Schmid, 2008). The efficiency of labeling was ~70-80% for RCLDyn1 C708 and ~20-30% for Dyn1 C708S (WT background) adding up to the 1:1 labeling achieved for Dyn1 WT and mutants. (C) Representative BODIPY-Rhodamine emission spectra of biochemically equivalent samples containing: BODIPY-Dyn1 WT (Donor only; BLUE) in the presence of unlabeled LT; BODIPY-Dyn1 WT in the presence of RhPE-labeled LT (Donor plus Acceptor; RED); and RhPE-labeled LT (Acceptor only sample; ORANGE) in the presence of unlabeled Dyn1 WT. FRET was ascertained by the donor emission intensity decrease at 510 nm and sensitized acceptor emission intensity increase at 590 nm upon donor excitation ( $\lambda_{ex} = 470$  nm). The protein and lipid concentrations were 0.1  $\mu$ M and 5  $\mu$ M, respectively. LT contained 10 mol% PIP<sub>2</sub>.

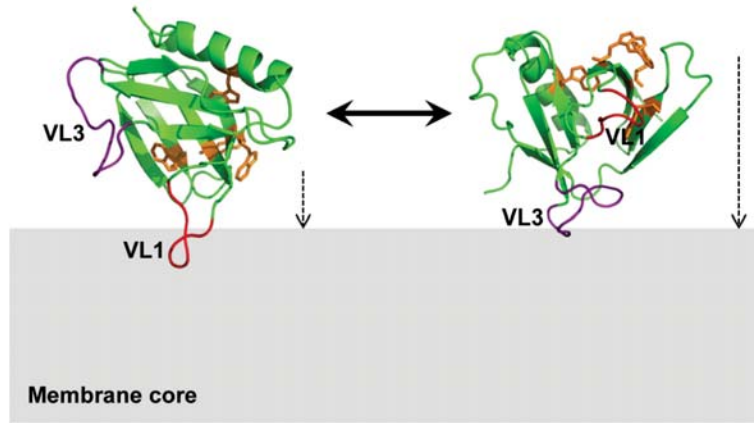

**Figure S5. Alternate orientations of the Dyn1 PH domain (PDB ID: 1DYN) that position either VL1 or VL3 proximally to the membrane surface. Dashed arrows represent the change in distance between the Trp cluster and the membrane surface between the two orientations.**

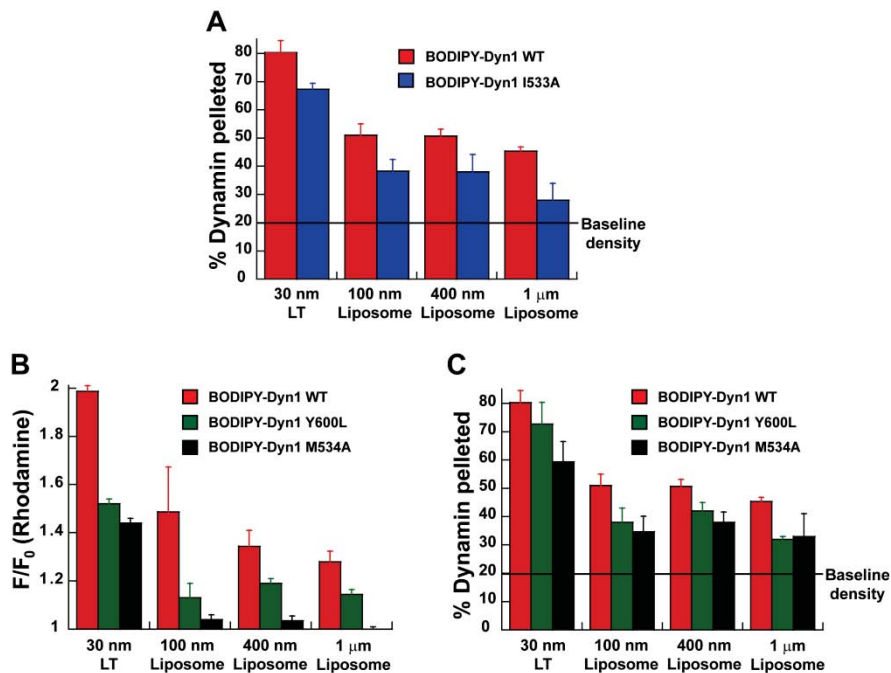

**Figure S6. Spin-sedimentation profiles for BODIPY-labeled full-length Dyn1 mutants and measurement of BODIPY-Rhodamine FRET in Dyn1 Y600L and Dyn1 M534A. (A) Stable binding of BODIPY-labeled-Dyn1 WT or -Dyn1 I533A (2.0  $\mu$ M) to lipid templates of varying membrane curvature (100  $\mu$ M total lipid) was examined by spin-sedimentation followed by SDS-PAGE and densitometric analyses of the supernatant (S) and pellet (P) fractions as described under Methods. % dynamin pelleted with the various templates is plotted. (B) FRET-sensitized increase in Rhodamine emission intensity upon incubation of lipid templates of varying membrane curvature containing 1 mol% RhPE (5  $\mu$ M total lipid) with either BODIPY-labeled-Dyn1 Y600L or -Dyn1 M534A (0.1  $\mu$ M) relative to BODIPY-labeled-Dyn1 WT monitored at 590 nm and plotted as  $F/F_0$ .  $F_0$  is the background emission intensity of Rhodamine (by direct excitation at  $\lambda_{ex} = 470$  nm) at time '0' prior to protein addition, and  $F$ , the intensity after 15 min of protein incubation. (C) Same as in panel (A) but with data for BODIPY-labeled-Dyn1 Y600L and -Dyn1 M534A plotted relative to BODIPY-labeled-Dyn1 WT.**

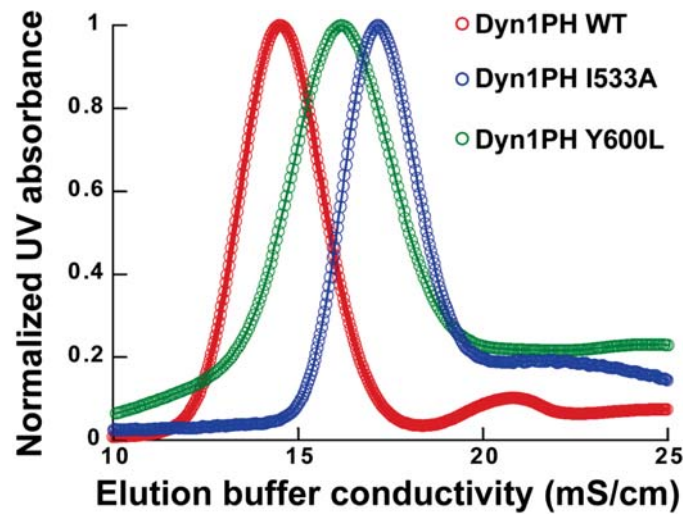

Figure S7. Mixed population of PH domain orientations in Dyn1PH Y600L. Same as in Fig. 5C. but with the inclusion of data for Dyn1PH Y600L.

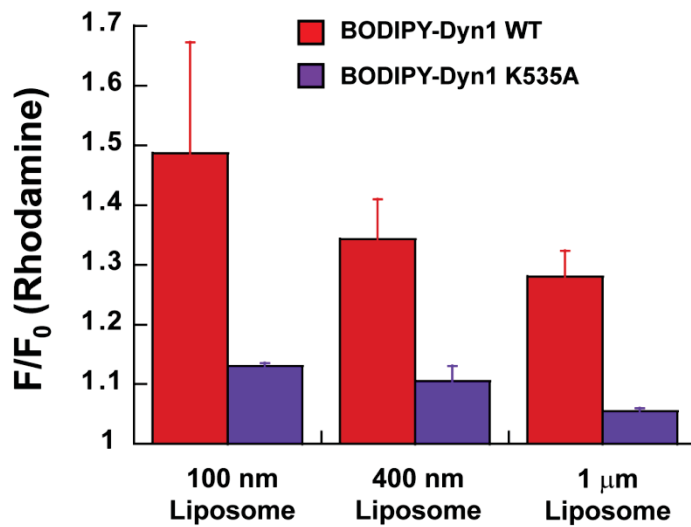

Figure S8. Comparison of BODIPY-Rhodamine FRET in BODIPY-Dyn1 WT and BODIPY-Dyn1 K535A. Same as in Fig. S6B but with the inclusion of data for BODIPY-Dyn1 K535A.
